# Supplementary material for: Yersinia pestis strains of ancient phylogenetic branch 0.ANT are widely spread in the high-mountain plague foci of Kyrgyzstan
Source: PLoS One. 2017 Oct 26;12(10):e0187230. doi: 10.1371/journal.pone.0187230 (PMC5658180; doi:10.1371/journal.pone.0187230)
Supplement: S3 Table — (XLSX) [file pone.0187230.s003.xlsx]

## Sheet: Лист1
S3 Table. Data production
	Contigs			Data production		Coverage and depth of the reference sequence CO92								Mapped	Match ratio	Mismatches	Error ratio
Strain ID	Number	Total length	N50	of raw reads	length of raw reads	Chromosome (NC_003143)		pMT1 (NC_003134)		pCD1 (NC_003131)		pPCP1 (NC_003132)
А-1486	555	4583051	30943	1651024	265372550	0.9913	48.78	1	88.5	1	210.97	1	2662.63	1487242	0.9008	17810	0,39%
А-1691	487	4640808	33740	1896267	304705320	0.998	54.16	0.9994	103.11	1	202.39	1	2855.03	1691470	0.892	14704	0,32%
231	484	4601654	30043	2343865	356171733	0.988	39.16	1	94.32	1	213	1	855	2200655	0.9389	16119	0,36%
А-1836	332	4617734	34317	1240063	251599950	0.998	81.96	0.9994	107.8	1	212.68	1	1308.02	1231011	0.9927	53378	1,16%
А-1815	601	4643073	29237	1788543	366826611	0.9894	60.39	0.9931	145.58	1	420.68	1	3680.74	1753666	0.9805	36280	0,79%
А-1809	598	4594757	28454	1619438	344066334	0.9932	65.56	0.9999	90.87	1	129.74	1	2259.96	1583001	0.9775	39771	0,88%
А-1249	386	4586327	32223	2132565	395081692	0.9899	66.67	0.9931	140.84	0.9967	389.83	1	4615.12	2119556	0.9939	18650	0,41%
